# Supplementary material for: Healthcare Costs of Smokers Using Varenicline Versus Nicotine-Replacement Therapy Patch in the United States: Evidence from Real-World Practice
Source: PubMed Central journal article supplement — Adv Ther. 2018 Dec 19;36(2):365–80. doi: 10.1007/s12325-018-0858-y (PMC6824348; doi:10.1007/s12325-018-0858-y), 2018-12-19
Supplement: 12325_2018_858_MOESM1_ESM.pdf [file 12325_2018_858_MOESM1_ESM.pdf]

## Supplementary Material

**Table S1. Diagnosis Codes**

| Conditions                             | ICD-9 Code/ Procedure Code      | ICD-10 Code      |
|----------------------------------------|---------------------------------|------------------|
| <b>Smoking attributable conditions</b> |                                 |                  |
| Cardiovascular diseases                |                                 |                  |
| Coronary heart disease                 | 410 - 414, 429.2                | I20 - I25        |
| Pulmonary heart disease                | 415 - 417                       | I26 - I28        |
| Rheumatic heart disease                | 390-398                         | I00 - I09        |
| Other forms of heart diseases          | 420 - 429.1, 429.3 - 429.9      | I30 - I52        |
| Cerebrovascular disease                | 430 - 438                       | I60 - I69        |
| Atherosclerosis                        | 440                             | I70              |
| Aortic aneurysm                        | 441                             | I71              |
| Other arterial disease                 | 442 - 448                       | I72 - I78        |
| Diabetes mellitus                      | 250                             | E10 - E14        |
| Pulmonary conditions                   |                                 |                  |
| Influenza                              | 487                             | J10 - J11        |
| Pneumonia                              | 480 - 486                       | J12 - J18        |
| Tuberculosis                           | 010 - 018                       | A16 - A19        |
| Chronic obstructive pulmonary disease  |                                 |                  |
| Bronchitis                             | 490 - 491                       | J40 - J42        |
| Emphysema                              | 492                             | J43              |
| Chronic airways obstruction            | 496                             | J44              |
| <b>Neuropsychiatric conditions</b>     |                                 |                  |
| Depression                             | 296.2, 296.3, 298.0, 309.0, 311 | F32, F33, F43.21 |
| Schizophrenia                          | 295                             | F20, F21, F25    |
| Bipolar disorder                       | 296.0, 296.1, 296.4 - 296.8     | F31              |

| <b>Conditions</b>              | <b>ICD-9 Code/ Procedure Code</b>                      | <b>ICD-10 Code</b>                                                                                                                                                                                                                                                                                                                                                                                                            |
|--------------------------------|--------------------------------------------------------|-------------------------------------------------------------------------------------------------------------------------------------------------------------------------------------------------------------------------------------------------------------------------------------------------------------------------------------------------------------------------------------------------------------------------------|
| Suicide attempt/self-harm      | E950-E959, E980-E982                                   | T14.91, T39.012A - T41.42A, T42.32A - T42.32A, T40.72A - T42.64A, T40.82A - T43.92A, T65.92A, T60.02A - T60.92A, T54.02A - T57.22A, T57.02A, T51.02A - T63.042A, T59.892A, T71.162A, T71.122A, X71 - X83; T39.014A - T40.44A, T42.34A, T43.014A - T43.94A, T36.04A - T44.14A, T50.904A, T54.04A - T57.24A, T60.04A - T60.94A, T57.04A, T51.04A - T63.044A, T59.894A - T59.894S, T58.04A, T58.14A - T58.94A, T53.54A - T59.94A |
| Post-traumatic stress disorder | 309.81                                                 | F43.10 - F43.12                                                                                                                                                                                                                                                                                                                                                                                                               |
| Other psychosis                | 293, 294, 297 - 299                                    | F05, R41.0, F06.2, F06.0, F06.30 - F06.34, F06.4, F06.1, F53, F06.8, F09; F04, F02.80, F02.81, F03.90, F06.8, F09, F06.0, F06.1, F06.8, F03.91; F22, F23, F24; F30.8, F44.89, F28, F29; F84.0, F84.3, F84.5, F84.8, F84.9                                                                                                                                                                                                     |
| Drug-induced mental disorders  | 292                                                    | F11 - F19                                                                                                                                                                                                                                                                                                                                                                                                                     |
| Anxiety disorder               | 300                                                    | F40 - F41                                                                                                                                                                                                                                                                                                                                                                                                                     |
| <b>Other conditions</b>        |                                                        |                                                                                                                                                                                                                                                                                                                                                                                                                               |
| Tobacco dependence             | 305.1                                                  | F17.200 - F17.291                                                                                                                                                                                                                                                                                                                                                                                                             |
| Cancer (excluding skin cancer) | 196 - 199                                              | C77 – C80                                                                                                                                                                                                                                                                                                                                                                                                                     |
| Smoking cessation counseling   | 99406, 99407, G0436, G0437, G8402, G8453, 0004F, 4000F | Z716                                                                                                                                                                                                                                                                                                                                                                                                                          |

**Table S2. Healthcare Costs in Follow-up**

| Initiator Population               |                            |                         |                            |                         |                            |                         |                            |                         |
|------------------------------------|----------------------------|-------------------------|----------------------------|-------------------------|----------------------------|-------------------------|----------------------------|-------------------------|
|                                    | Quarter 1                  |                         | Quarter 2                  |                         | Quarter 3                  |                         | Quarter 4                  |                         |
|                                    | Varenicline<br>(n=209,284) | NRT Patch<br>(n=34,593) | Varenicline<br>(n=175,684) | NRT Patch<br>(n=27,557) | Varenicline<br>(n=153,792) | NRT Patch<br>(n=22,606) | Varenicline<br>(n=132,205) | NRT Patch<br>(n=18,047) |
| <b>Smoking-attributable Costs</b>  |                            |                         |                            |                         |                            |                         |                            |                         |
| Total Costs                        | \$1,185<br>(\$6,179)       | \$2,093<br>(\$13,161)   | \$679<br>(\$5,966)         | \$1,374<br>(\$8,862)    | \$619<br>(\$4,832)         | \$1,277<br>(\$10,448)   | \$614<br>(\$4,715)         | \$1,107<br>(\$6,612)    |
| Medical Costs                      | \$588<br>(\$6,090)         | \$1,742<br>(\$13,055)   | \$445<br>(\$5,894)         | \$1,119<br>(\$8,749)    | \$407<br>(\$4,742)         | \$1,029<br>(\$10,375)   | \$401<br>(\$4,611)         | \$863<br>(\$6,497)      |
| Outpatient Costs                   | \$306<br>(\$2,807)         | \$784<br>(\$4,440)      | \$215<br>(\$2,376)         | \$512<br>(\$3,810)      | \$207<br>(\$2,209)         | \$438<br>(\$4,268)      | \$209<br>(\$2,353)         | \$385<br>(\$3,010)      |
| Inpatient/ER Costs                 | \$282<br>(\$5,061)         | \$957<br>(\$11,668)     | \$230<br>(\$5,140)         | \$606<br>(\$7,396)      | \$199<br>(\$3,944)         | \$591<br>(\$9,113)      | \$192<br>(\$3,704)         | \$478<br>(\$5,406)      |
| Pharmacy Costs                     | \$597 (\$665)              | \$351 (\$772)           | \$234 (\$602)              | \$255 (\$851)           | \$212 (\$605)              | \$247 (\$678)           | \$212 (\$641)              | \$244 (\$631)           |
| Smoking Cessation<br>Therapy Costs | \$418 (\$244)              | \$71 (\$49)             | \$65 (\$168)               | \$7 (\$26)              | \$40 (\$132)               | \$4 (\$20)              | \$35 (\$138)               | \$4 (\$19)              |
| <b>All-cause Costs</b>             |                            |                         |                            |                         |                            |                         |                            |                         |
| Total Costs                        | \$4,124<br>(\$13,719)      | \$8,602<br>(\$26,657)   | \$3,128<br>(\$12,922)      | \$6,152<br>(\$21,025)   | \$2,974<br>(\$11,537)      | \$5,543<br>(\$21,317)   | \$2,990<br>(\$12,944)      | \$5,136<br>(\$20,366)   |
| Medical Costs                      | \$3,047<br>(\$13,344)      | \$7,558<br>(\$26,102)   | \$2,418<br>(\$12,475)      | \$5,223<br>(\$20,270)   | \$2,284<br>(\$11,054)      | \$4,623<br>(\$20,701)   | \$2,284<br>(\$11,895)      | \$4,234<br>(\$19,790)   |
| Outpatient Costs                   | \$1,853<br>(\$7,006)       | \$4,137<br>(\$13,625)   | \$1,434<br>(\$6,181)       | \$2,817<br>(\$11,655)   | \$1,387<br>(\$6,069)       | \$2,518<br>(\$11,062)   | \$1,383<br>(\$6,207)       | \$2,310<br>(\$10,305)   |
| Inpatient/ER Costs                 | \$1,194<br>(\$10,311)      | \$3,421<br>(\$20,227)   | \$984<br>(\$10,036)        | \$2,406<br>(\$14,753)   | \$897<br>(\$8,305)         | \$2,105<br>(\$15,989)   | \$902<br>(\$9,204)         | \$1,924<br>(\$14,822)   |
| Pharmacy Costs                     | \$1,076<br>(\$2,442)       | \$1,044<br>(\$3,444)    | \$710<br>(\$2,715)         | \$929<br>(\$4,100)      | \$689<br>(\$2,634)         | \$920<br>(\$3,837)      | \$706<br>(\$3,295)         | \$902<br>(\$3,762)      |

| Adherent Population                |                           |                        |                           |                                    |                           |                                     |                           |                                     |
|------------------------------------|---------------------------|------------------------|---------------------------|------------------------------------|---------------------------|-------------------------------------|---------------------------|-------------------------------------|
|                                    | Quarter 1                 |                        | Quarter 2                 |                                    | Quarter 3                 |                                     | Quarter 4                 |                                     |
|                                    | Varenicline<br>(n=38,744) | NRT Patch<br>(n=2,702) | Varenicline<br>(n=32,385) | NRT Patch<br>(n=2,218)             | Varenicline<br>(n=28,215) | NRT Patch<br>(n=1,840)              | Varenicline<br>(n=24,126) | NRT Patch<br>(n=1,479)              |
| <b>Smoking-attributable Costs</b>  |                           |                        |                           |                                    |                           |                                     |                           |                                     |
| Total Costs                        | \$1,730<br>(\$5,959)      | \$2,561<br>(\$11,085)  | \$989<br>(\$8,302)        | \$1,571<br>(\$8,797)               | \$782<br>(\$5,074)        | \$1,761<br>(\$20,012)               | \$794<br>(\$6,001)        | \$1,101<br>(\$4,716)                |
| Medical Costs                      | \$685<br>(\$5,846)        | \$2,026<br>(\$10,960)  | \$581<br>(\$8,224)        | \$1,209<br>(\$8,709)               | \$458<br>(\$4,949)        | \$1,434<br>(\$19,960)               | \$482<br>(\$5,895)        | \$769<br>(\$4,604)                  |
| Outpatient Costs                   | \$368<br>(\$2,867)        | \$978<br>(\$4,789)     | \$282<br>(\$2,813)        | \$624<br>(\$4,931)                 | \$242<br>(\$2,054)        | \$388<br>(\$2,095)                  | \$246<br>(\$2,599)        | \$397<br>(\$2,700)                  |
| Inpatient/ER Costs                 | \$318<br>(\$4,717)        | \$1,048<br>(\$9,164)   | \$299<br>(\$7,488)        | \$585<br>(\$6,278)                 | \$216<br>(\$4,181)        | \$1,046<br>(\$19,656) <sup>NS</sup> | \$236<br>(\$4,873)        | \$372<br>(\$3,587) <sup>NS</sup>    |
| Pharmacy Costs                     | \$1,045<br>(\$719)        | \$534 (\$832)          | \$408 (\$776)             | \$362 (\$847)                      | \$324 (\$801)             | \$326<br>(\$826) <sup>NS</sup>      | \$312 (\$823)             | \$332 (\$700)                       |
| Smoking Cessation<br>Therapy Costs | \$798 (\$230)             | \$176 (\$72)           | \$175 (\$260)             | \$30 (\$57)                        | \$82 (\$195)              | \$14 (\$42)                         | \$66 (\$186)              | \$10 (\$36)                         |
| <b>All-cause Costs</b>             |                           |                        |                           |                                    |                           |                                     |                           |                                     |
| Total Costs                        | \$4,708<br>(\$12,628)     | \$8,398<br>(\$23,140)  | \$3,709<br>(\$13,689)     | \$5,935<br>(\$19,439)              | \$3,397<br>(\$11,940)     | \$5,550<br>(\$24,982)               | \$3,506<br>(\$18,150)     | \$4,209<br>(\$12,355)               |
| Medical Costs                      | \$3,107<br>(\$12,216)     | \$7,058<br>(\$22,614)  | \$2,751<br>(\$13,277)     | \$4,844<br>(\$18,736)              | \$2,529<br>(\$11,463)     | \$4,474<br>(\$24,624)               | \$2,591<br>(\$15,500)     | \$3,134<br>(\$11,396) <sup>NS</sup> |
| Outpatient Costs                   | \$1,955<br>(\$6,718)      | \$4,117<br>(\$15,708)  | \$1,596<br>(\$6,452)      | \$2,918<br>(\$11,549)              | \$1,516<br>(\$5,799)      | \$2,324<br>(\$8,435)                | \$1,555<br>(\$7,588)      | \$2,060<br>(\$8,911)                |
| Inpatient/ER Costs                 | \$1,152<br>(\$9,280)      | \$2,941<br>(\$14,355)  | \$1,155<br>(\$10,759)     | \$1,926<br>(\$13,294)              | \$1,014<br>(\$8,936)      | \$2,150<br>(\$21,820)               | \$1,036<br>(\$12,761)     | \$1,075<br>(\$6,251) <sup>NS</sup>  |
| Pharmacy Costs                     | \$1,601<br>(\$2,425)      | \$1,340<br>(\$3,735)   | \$958<br>(\$2,552)        | \$1,091<br>(\$4,164) <sup>NS</sup> | \$868<br>(\$2,485)        | \$1,077<br>(\$3,332)                | \$915<br>(\$5,163)        | \$1,075<br>(\$4,366) <sup>NS</sup>  |

Mean (standard deviation) [median] were reported for continuous variables.

All differences between VAR and NRT patch cohort were statistically significant at 0.05 level, unless noted otherwise.

NS = p value  $\geq$  0.05

**Table S3. Propensity Score Regressions and Summary Statistics**

| Covariates                                   | Initiator Population |               | Adherent Population |               |
|----------------------------------------------|----------------------|---------------|---------------------|---------------|
|                                              | Odds Ratio           | 95% CI        | Odds Ratio          | 95% CI        |
| Age groups                                   |                      |               |                     |               |
| 45-54 vs 18-44                               | 1.01                 | (0.95 - 1.07) | 1.20                | (1.01 - 1.43) |
| 55-64 vs 18-44                               | 0.91                 | (0.86 - 0.96) | 1.06                | (0.90 - 1.25) |
| 65+ vs 18-44                                 | 0.89                 | (0.84 - 0.94) | 1.05                | (0.89 - 1.23) |
| Gender                                       |                      |               |                     |               |
| Male vs female                               | 0.91                 | (0.89 - 0.93) | 1.01                | (0.93 - 1.09) |
| Health plan out-of-network coverage          |                      |               |                     |               |
| Covered vs not covered                       | 0.49                 | (0.47 - 0.51) | 0.61                | (0.53 - 0.70) |
| Other/missing vs not covered                 | 0.92                 | (0.89 - 0.95) | 0.91                | (0.83 - 1.01) |
| Region                                       |                      |               |                     |               |
| North Central vs West                        | 0.54                 | (0.48 - 0.61) | 0.58                | (0.38 - 0.88) |
| Northeast vs West                            | 0.77                 | (0.68 - 0.86) | 0.83                | (0.55 - 1.26) |
| South vs West                                | 1.26                 | (1.12 - 1.42) | 1.45                | (0.95 - 2.21) |
| Unknown/missing vs West                      | 0.81                 | (0.72 - 0.92) | 0.90                | (0.59 - 1.39) |
| Residence type                               |                      |               |                     |               |
| Urban vs Rural                               | 0.86                 | (0.83 - 0.89) | 0.83                | (0.74 - 0.92) |
| Index year                                   |                      |               |                     |               |
| 2012 vs 2016                                 | 3.13                 | (2.97 - 3.29) | 2.70                | (2.27 - 3.20) |
| 2013 vs 2016                                 | 2.29                 | (2.19 - 2.39) | 2.18                | (1.88 - 2.52) |
| 2014 vs 2016                                 | 1.48                 | (1.43 - 1.54) | 1.37                | (1.20 - 1.56) |
| 2015 vs 2016                                 | 0.92                 | (0.88 - 0.96) | 0.89                | (0.78 - 1.01) |
| Baseline characteristics                     |                      |               |                     |               |
| Diagnosis of specific conditions (Yes vs No) |                      |               |                     |               |
| Cardiovascular diseases                      | 0.87                 | (0.83 - 0.90) | 0.86                | (0.76 - 0.98) |
| Diabetes                                     | 1.24                 | (1.19 - 1.30) | 1.23                | (1.07 - 1.42) |
| Pulmonary conditions                         | 0.98                 | (0.95 - 1.02) | 0.89                | (0.79 - 1.01) |
| Neuropsychiatric conditions                  | 0.60                 | (0.58 - 0.61) | 0.62                | (0.56 - 0.68) |

| <b>Covariates</b>                                    | <b>Initiator Population</b>      |               | <b>Adherent Population</b>       |               |
|------------------------------------------------------|----------------------------------|---------------|----------------------------------|---------------|
|                                                      | <b>Odds Ratio</b>                | <b>95% CI</b> | <b>Odds Ratio</b>                | <b>95% CI</b> |
| Cancer (excluding skin cancer)                       | 0.98                             | (0.91 - 1.04) | 0.84                             | (0.68 - 1.03) |
| Charlson Comorbidity Index                           |                                  |               |                                  |               |
| 0 vs 3+                                              | 2.48                             | (2.35 - 2.61) | 1.73                             | (1.45 - 2.06) |
| 1 vs 3+                                              | 1.69                             | (1.61 - 1.77) | 1.32                             | (1.13 - 1.54) |
| 2 vs 3+                                              | 1.37                             | (1.30 - 1.43) | 1.11                             | (0.96 - 1.29) |
| Any smoking cessation counseling (Yes vs No)         | 1.09                             | (1.03 - 1.15) | 1.03                             | (0.87 - 1.22) |
| Any smoking attributable hospitalization (Yes vs No) | 0.23                             | (0.22 - 0.25) | 0.25                             | (0.21 - 0.30) |
| Total smoking attributable healthcare costs (\$)     | 0.99                             | (0.99 - 1.00) | 0.98                             | (0.97 - 1.00) |
| Number of quarters in follow-up                      | 1.08                             | (1.07 - 1.09) | 1.02                             | (0.98 - 1.06) |
| <b>Summary Statistics of Propensity Score</b>        | <b>Mean (Standard Deviation)</b> |               | <b>Mean (Standard Deviation)</b> |               |
| Varenicline cohort                                   | 0.87 (0.10)                      |               | 0.94 (0.05)                      |               |
| NRT patch cohort                                     | 0.77 (0.17)                      |               | 0.89 (0.11)                      |               |

Logistic regression was conducted on the indicator of being in varenicline cohort (vs. in NRT patch cohort).

Abbreviations: NRT = nicotine replacement therapy

**Table S4. Regressions Results on Healthcare Costs**

| Coefficients on treatment cohort in different regressions    | Total Costs            |                    | Medical Costs          |                    | Pharmacy Costs         |                    | Outpatient Costs       |                    | Inpatient & ER Costs   |                    |
|--------------------------------------------------------------|------------------------|--------------------|------------------------|--------------------|------------------------|--------------------|------------------------|--------------------|------------------------|--------------------|
|                                                              | Any costs <sup>†</sup> | Costs <sup>‡</sup> |
|                                                              | Odds Ratio             | Cost Ratio         |
| <b>Smoking-attributable costs among initiator population</b> |                        |                    |                        |                    |                        |                    |                        |                    |                        |                    |
| Treatment cohort (varenicline vs NRT patch) by quarter       |                        |                    |                        |                    |                        |                    |                        |                    |                        |                    |
| Quarter 1                                                    | 96.14*                 | 1.30*              | 1.34*                  | 0.79*              | 104.46*                | 3.04*              | 1.31*                  | 0.87*              | 0.78*                  | 1.02               |
| Quarter 2                                                    | 0.36*                  | 1.08*              | 0.70*                  | 0.87*              | 0.40*                  | 1.62*              | 0.68*                  | 0.91*              | 0.70*                  | 1.00               |
| Quarter 3                                                    | 0.30*                  | 1.01               | 0.72*                  | 0.80*              | 0.34*                  | 1.53*              | 0.70*                  | 0.91*              | 0.70*                  | 0.77*              |
| Quarter 4                                                    | 0.30*                  | 1.01               | 0.73*                  | 0.80*              | 0.34*                  | 1.55*              | 0.71*                  | 0.92               | 0.68*                  | 0.86*              |
| <b>All-cause costs among initiator population</b>            |                        |                    |                        |                    |                        |                    |                        |                    |                        |                    |
| Treatment cohort (varenicline vs NRT patch) by quarter       |                        |                    |                        |                    |                        |                    |                        |                    |                        |                    |
| Quarter 1                                                    | 107.07*                | 0.99               | 2.11*                  | 0.81*              | 29.66*                 | 1.82*              | 2.1*                   | 0.85*              | 0.8*                   | 1.03               |
| Quarter 2                                                    | 0.57*                  | 0.83*              | 0.7*                   | 0.8*               | 0.48*                  | 1.09*              | 0.69*                  | 0.8*               | 0.74*                  | 0.91*              |
| Quarter 3                                                    | 0.50*                  | 0.82*              | 0.69*                  | 0.79*              | 0.42*                  | 1.07*              | 0.68*                  | 0.8*               | 0.72*                  | 0.9*               |
| Quarter 4                                                    | 0.50*                  | 0.84*              | 0.69*                  | 0.81*              | 0.41*                  | 1.14*              | 0.69*                  | 0.83*              | 0.72*                  | 0.91*              |
| <b>Smoking-attributable costs among adherent population</b>  |                        |                    |                        |                    |                        |                    |                        |                    |                        |                    |
| Treatment cohort (varenicline vs NRT patch) by quarter       |                        |                    |                        |                    |                        |                    |                        |                    |                        |                    |
| Quarter 1                                                    | 61.61*                 | 1.59*              | 1.3*                   | 0.79*              | 60.46*                 | 3.12*              | 1.27*                  | 0.88               | 0.78*                  | 0.99               |
| Quarter 2                                                    | 0.65*                  | 0.98               | 0.73*                  | 0.87               | 0.72*                  | 1.46*              | 0.71*                  | 0.95               | 0.72*                  | 0.93               |
| Quarter 3                                                    | 0.37*                  | 0.86               | 0.72*                  | 0.73*              | 0.42*                  | 1.22*              | 0.69*                  | 0.84               | 0.71*                  | 0.76               |
| Quarter 4                                                    | 0.33*                  | 0.86               | 0.74*                  | 0.76*              | 0.38*                  | 1.21*              | 0.71*                  | 0.85               | 0.7*                   | 0.79               |
| <b>All-cause costs among adherent population</b>             |                        |                    |                        |                    |                        |                    |                        |                    |                        |                    |
| Treatment cohort (varenicline vs NRT patch) by quarter       |                        |                    |                        |                    |                        |                    |                        |                    |                        |                    |
| Quarter 1                                                    | 65.86*                 | 1.14*              | 2.11*                  | 0.85*              | 17.13*                 | 2.11*              | 2.09*                  | 0.90*              | 0.82*                  | 1.04               |
| Quarter 2                                                    | 0.69*                  | 0.92               | 0.72*                  | 0.91               | 0.71*                  | 1.11               | 0.71*                  | 0.87*              | 0.84*                  | 0.99               |
| Quarter 3                                                    | 0.46*                  | 0.88*              | 0.7*                   | 0.87*              | 0.48*                  | 1.02               | 0.68*                  | 0.87*              | 0.8*                   | 0.93               |

| Coefficients on treatment cohort in different regressions | Total Costs            |                    | Medical Costs          |                    | Pharmacy Costs         |                    | Outpatient Costs       |                    | Inpatient & ER Costs   |                    |
|-----------------------------------------------------------|------------------------|--------------------|------------------------|--------------------|------------------------|--------------------|------------------------|--------------------|------------------------|--------------------|
|                                                           | Any costs <sup>†</sup> | Costs <sup>‡</sup> |
|                                                           | Odds Ratio             | Cost Ratio         |
| Quarter 4                                                 | 0.44*                  | 0.92               | 0.7*                   | 0.93               | 0.44*                  | 1.07               | 0.68*                  | 0.92               | 0.81*                  | 0.96               |

† Logistic regression on probability of any costs; other covariates included baseline characteristics — demographics , Charlson Comorbidity Index, diagnosis of specific conditions (cardiovascular diseases, diabetes mellitus, pulmonary conditions, neuropsychiatric conditions, malignancy [excluding skin cancer], and tobacco dependence), use of smoking cessation counseling, occurrence of hospitalization (SA or all cause, corresponding to study outcomes), healthcare costs (corresponding to study outcomes) — and propensity scores

‡ Generalized linear model with gamma distribution and log link, among patients with any costs; other covariates included baseline characteristics — demographics , Charlson Comorbidity Index, diagnosis of specific conditions (cardiovascular diseases, diabetes mellitus, pulmonary conditions, neuropsychiatric conditions, malignancy [excluding skin cancer], and tobacco dependence), use of smoking cessation counseling, occurrence of hospitalization (SA or all cause, corresponding to study outcomes), healthcare costs (corresponding to study outcomes) — and propensity scores

\* p <0.05

Abbreviations: NRT = nicotine replacement therapy



**Table S5. Sensitivity Analysis: Patient Characteristics in Follow-up after Propensity Score Matching**

|                                     | Initiator Population                         |                      |                                                      |                      | Adherent Population                          |                     |                                                      |                     |
|-------------------------------------|----------------------------------------------|----------------------|------------------------------------------------------|----------------------|----------------------------------------------|---------------------|------------------------------------------------------|---------------------|
|                                     | Study Sample in Main Analysis after Matching |                      | Subgroup with ≥12 Months of Follow-up after Matching |                      | Study Sample in Main Analysis after Matching |                     | Subgroup with ≥12 Months of Follow-up after Matching |                     |
|                                     | Varenicline (n=53,100)                       | NRT Patch (n=26,550) | Varenicline (n=29,408)                               | NRT Patch (n=14,704) | Varenicline (n=5,048)                        | NRT Patch (n=2,524) | Varenicline (n=2,104)                                | NRT Patch (n=1,052) |
| Age                                 | 48.6 (11.8)                                  | 47.8 (12.7)*         | 48.7 (11.7)                                          | 48.4 (12.6)*         | 50.9 (10.8)                                  | 51.0 (12.1)         | 50 (11)                                              | 50 (12)             |
| Male                                | 24,232 (45.6%)                               | 12,405 (46.7%)*      | 13,734 (46.7%)                                       | 6,878 (46.8%)        | 2,575 (51.0%)                                | 1,287 (51.0%)       | 1,022 (49%)                                          | 532 (51%)           |
| Health plan out-of-network coverage |                                              | *                    |                                                      |                      |                                              |                     |                                                      |                     |
| Covered                             | 8,152 (15.4%)                                | 4,475 (16.9%)        | 5,067 (17.2%)                                        | 2,495 (17.0%)        | 697 (13.8%)                                  | 339 (13.4%)         | 274 (13%)                                            | 142 (13%)           |
| Not covered                         | 34,545 (65.1%)                               | 16,861 (63.5%)       | 19,534 (66.4%)                                       | 9,772 (66.5%)        | 3,286 (65.1%)                                | 1,642 (65.1%)       | 1,432 (68%)                                          | 698 (66%)           |
| Other/missing                       | 10,403 (19.6%)                               | 5,214 (19.6%)        | 4,807 (16.3%)                                        | 2,437 (16.6%)        | 1,065 (21.1%)                                | 543 (21.5%)         | 398 (19%)                                            | 212 (20%)           |
| Region                              |                                              | *                    |                                                      | *                    |                                              |                     |                                                      |                     |
| Northeast                           | 13,093 (24.7%)                               | 6,967 (26.2%)        | 7,820 (26.6%)                                        | 3,761 (25.6%)        | 1,368 (27.1%)                                | 674 (26.7%)         | 524 (25%)                                            | 229 (22%)           |
| North Central                       | 15,627 (29.4%)                               | 8,083 (30.4%)        | 9,162 (31.2%)                                        | 4,665 (31.7%)        | 1,565 (31.0%)                                | 774 (30.7%)         | 655 (31%)                                            | 360 (34%)           |
| South                               | 16,319 (30.7%)                               | 7,623 (28.7%)        | 8,256 (28.1%)                                        | 4,238 (28.8%)        | 1,368 (27.1%)                                | 700 (27.7%)         | 602 (29%)                                            | 315 (30%)           |
| West                                | 7,377 (13.9%)                                | 3,617 (13.6%)        | 4,001 (13.6%)                                        | 1,915 (13.0%)        | 702 (13.9%)                                  | 352 (13.9%)         | 305 (14%)                                            | 145 (14%)           |
| Unknown/missing                     | 684 (1.3%)                                   | 260 (1.0%)           | 169 (0.6%)                                           | 125 (0.9%)           | 45 (0.9%)                                    | 24 (1.0%)           | 18 (1%)                                              | 3 (0%)              |
| Residence type, Urban               | 43,465 (81.9%)                               | 21,658 (81.6%)       | 24,068 (81.8%)                                       | 12,012 (81.7%)       | 4,082 (80.9%)                                | 2,060 (81.6%)       | 1,717 (82%)                                          | 860 (82%)           |
| Index year                          |                                              | *                    |                                                      |                      |                                              |                     |                                                      |                     |
| 2012                                | 5,127 (9.7%)                                 | 2,342 (8.8%)         | 3,407 (11.6%)                                        | 1,720 (11.7%)        | 425 (8.4%)                                   | 214 (8.5%)          | 234 (11%)                                            | 125 (12%)           |
| 2013                                | 10,279 (19.4%)                               | 4,897 (18.4%)        | 7,375 (25.1%)                                        | 3,786 (25.7%)        | 828 (16.4%)                                  | 418 (16.6%)         | 532 (25%)                                            | 266 (25%)           |
| 2014                                | 12,212 (23.0%)                               | 6,066 (22.8%)        | 7,570 (25.7%)                                        | 3,786 (25.7%)        | 1,179 (23.4%)                                | 604 (23.9%)         | 619 (29%)                                            | 288 (27%)           |
| 2015                                | 13,594 (25.6%)                               | 6,946 (26.2%)        | 11,035 (37.5%)                                       | 5,399 (36.7%)        | 1,397 (27.7%)                                | 695 (27.5%)         | 718 (34%)                                            | 372 (35%)           |
| 2016                                | 11,888 (22.4%)                               | 6,299 (23.7%)        | 21 (0.1%)                                            | 13 (0.1%)            | 1,219 (24.1%)                                | 593 (23.5%)         | 1 (0%)                                               | 1 (0%)              |

|                                  | Initiator Population                         |                      |                                                      |                      | Adherent Population                          |                     |                                                      |                     |
|----------------------------------|----------------------------------------------|----------------------|------------------------------------------------------|----------------------|----------------------------------------------|---------------------|------------------------------------------------------|---------------------|
|                                  | Study Sample in Main Analysis after Matching |                      | Subgroup with ≥12 Months of Follow-up after Matching |                      | Study Sample in Main Analysis after Matching |                     | Subgroup with ≥12 Months of Follow-up after Matching |                     |
|                                  | Varenicline (n=53,100)                       | NRT Patch (n=26,550) | Varenicline (n=29,408)                               | NRT Patch (n=14,704) | Varenicline (n=5,048)                        | NRT Patch (n=2,524) | Varenicline (n=2,104)                                | NRT Patch (n=1,052) |
| Diagnosis of specific conditions |                                              |                      |                                                      |                      |                                              |                     |                                                      |                     |
| Cardiovascular diseases          | 8,740 (16.5%)                                | 3,791 (14.3%)*       | 4,638 (15.8%)                                        | 2,373 (16.1%)        | 1,076 (21.3%)                                | 551 (21.8%)         | 286 (14%)                                            | 152 (14%)           |
| Diabetes mellitus                | 6,448 (12.1%)                                | 2,991 (11.3%)*       | 3,282 (11.2%)                                        | 1,684 (11.5%)        | 656 (13.0%)                                  | 342 (13.5%)         | 247 (12%)                                            | 125 (12%)           |
| Pulmonary conditions             | 7,912 (14.9%)                                | 3,678 (13.9%)*       | 4,040 (13.7%)                                        | 2,063 (14.0%)        | 898 (17.8%)                                  | 450 (17.8%)         | 281 (13%)                                            | 130 (12%)           |
| Neuropsychiatric conditions      | 13,483 (25.4%)                               | 6,673 (25.1%)        | 5,366 (18.2%)                                        | 2,803 (19.1%)*       | 1,361 (27.0%)                                | 673 (26.7%)         | 351 (17%)                                            | 177 (17%)           |
| Tobacco dependence               | 17,761 (33.4%)                               | 8,414 (31.7%)*       | 8,958 (30.5%)                                        | 4,650 (31.6%)*       | 1,774 (35.1%)                                | 891 (35.3%)         | 636 (30%)                                            | 303 (29%)           |
| Charlson Comorbidity Index       | 1.2 (1.5)                                    | 1.0 (1.5) *          | 1.1 (1.5)                                            | 1.1 (1.6)            | 1.4 (1.8)                                    | 1.4 (1.8)           | 1 (2)                                                | 1 (2)               |
| Any smoking cessation counseling | 3,288 (6.2%)                                 | 1,639 (6.2%)         | 1,701 (5.8%)                                         | 892 (6.1%)           | 341 (6.8%)                                   | 164 (6.5%)          | 126 (6%)                                             | 54 (5%)             |
| Any all-cause hospitalization    | 1,848 (3.5%)                                 | 1,235 (4.7%)*        | 2,246 (7.6%)                                         | 1,180 (8.0%)         | 855 (16.9%)                                  | 437 (17.3%)         | 73 (3%)                                              | 47 (4%)             |
| All-cause total healthcare cost  | \$6,084 (\$11,255)                           | \$6,068 (\$10,228)   | \$7,844 (\$18,032)                                   | \$8,563 (\$20,317)*  | \$12,684 (\$26,272)                          | \$15,372 (\$45,055) | \$6,091 (\$13,029)                                   | \$7,676 (\$33,289)  |

N (%) were reported for categorical/binary variables, and mean (standard deviation) were reported for continuous variables.

All standard differences were <10%.

\* p <0.05

Abbreviations: NRT = nicotine replacement therapy; VAR = varenicline
